# Supplementary material for: Metformin Therapy and Breast Cancer Incidence in the Hail Region
Source: Preprints.org preprint supplement (doi:10.20944/preprints202212.0244.v2), 2023-01-13

Kingdom of Saudi Arabia  
Ministry of Education  
University of Hail  
Research Ethics Committee

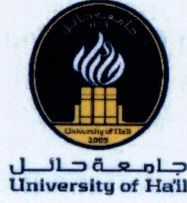

المملكة العربية السعودية  
وزارة التعليم  
جامعة حائل  
اللجنة الدائمة لأخلاقيات البحث  
العلمي

موافقة اللجنة الدائمة لأخلاقيات البحث العلمي على إجراء بحث  
Ethical Approval of Scientific Research

This study has been reviewed and approved by the Research Ethics Committee (REC) at University of Hail dated: 6 / 12 / 2021.

|                                            |                                                                          |                            |
|--------------------------------------------|--------------------------------------------------------------------------|----------------------------|
| No. of Research                            | H-2021-218                                                               | رقم البحث                  |
| Title of Research Project and its Duration | Metformin therapy and breast cancer incidence in Hail region<br>3 months | عنوان المشروع البحثي ومدته |
| Principal Investigator                     | Dr. Mhdia Elhadi Dafa Alla Osman                                         | اسم الباحث الرئيسي         |
| College/Centre                             | College of Pharmacy                                                      | الكلية/المركز              |
| Mobile/e-mail                              | med.osan@uoh.edu.sa<br>966590516038                                      | جوال/بريد إلكتروني         |
| Type of Research                           | Original                                                                 | نوع البحث                  |

Signed: 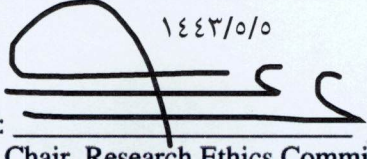  
Chair, Research Ethics Committee  
University of Hail

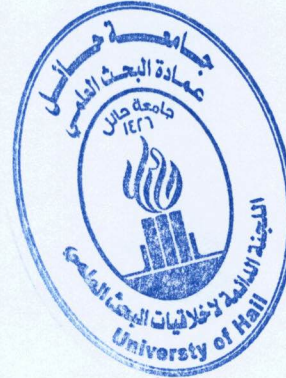

Supplement: Supplementary file 1 [file Ethical approval.pdf › suplmentery file/Ethical approval.pdf]
