# Supplementary material for: Metformin Therapy and Breast Cancer Incidence in the Hail Region
Source: Preprints.org preprint supplement (doi:10.20944/preprints202212.0244.v2), 2023-01-13
Supplement: Supplementary file 2 [file questionniar form -arabic copy-.docx_2.pdf › suplmentery file/questionniar form -arabic copy-.docx_2.pdf]

| المتغيرات                                                                                                        | التصنيف                  | المجموع |
|------------------------------------------------------------------------------------------------------------------|--------------------------|---------|
| العمر                                                                                                            | 35-25                    |         |
|                                                                                                                  | 35-45                    |         |
|                                                                                                                  | 45-55                    |         |
|                                                                                                                  | أكبر من 55               |         |
| المستوى التعليمي                                                                                                 | ابتدائي                  |         |
|                                                                                                                  | متوسط                    |         |
|                                                                                                                  | ثانوي                    |         |
|                                                                                                                  | جامعي                    |         |
| هل لديك السكري من النوع الثاني ؟                                                                                 | نعم                      |         |
|                                                                                                                  | لا                       |         |
| هل تأخذين علاج الميتفورمين لعلاج السكري ؟<br>Metformin<br>يعرف أيضاً باسم جلوكوفاج<br>Glucophage                 | نعم                      |         |
|                                                                                                                  | لا                       |         |
| كم مضى على استخدامك لهذا العلاج ؟<br>(الفترة الزمنية)                                                            | خلال الخمس سنوات الماضية |         |
|                                                                                                                  | أكثر من خمس سنوات        |         |
|                                                                                                                  | خلال عشر سنوات الماضية   |         |
|                                                                                                                  | أكثر من عشر سنوات        |         |
| هل تأخذين أي أدوية أخرى غير الميتفورمين خافضه للسكر ؟<br>إذا كانت الإجابة نعم<br>الرجاء كتابة اسم الدواء         | نعم                      |         |
|                                                                                                                  | لا                       |         |
| هل لديك أي حالة صحية أخرى غير السكري ؟<br>إذا كانت الإجابة نعم<br>الرجاء كتابة اسم الحالة<br>المصابة لمرض السكري | نعم                      |         |
|                                                                                                                  | لا                       |         |
|                                                                                                                  |                          |         |

|  |                                                     |                                                                                                             |
|--|-----------------------------------------------------|-------------------------------------------------------------------------------------------------------------|
|  | نعم                                                 | هل هناك افراد من العائلة مصابون بمرض السكري ؟                                                               |
|  | لا                                                  |                                                                                                             |
|  | اقارب من الدرجة الأولى ( الام والأب والاشقاء )      | الرجاء تحديد درجة القرابة تستطيع الإجابة على هذا السؤال فقط في حالة أجبت بنعم للسؤال السابق (درجة القرابة ) |
|  | اقارب من الدرجة الثانية ( أقارب من جهة الام والأب ) |                                                                                                             |
|  | اقارب من الدرجة الثالثة ( أبناء أقارب الام والأب )  |                                                                                                             |
|  | أقارب الدرجة الرابعة ( اجداد الوالدين )             |                                                                                                             |

|  |                                           |                                                               |
|--|-------------------------------------------|---------------------------------------------------------------|
|  | نعم، اتناوله بانتظام دائما                | هل تقومين بأخذ علاجك بانتظام كما وصفه لك الدكتور او الصيدلي ؟ |
|  | اتناول الدواء كما مطلوب لكن بأوقات مختلفة |                                                               |
|  | انسى ان اخذ الدواء أحيانا                 |                                                               |
|  | لاأخذه بانتظام                            |                                                               |
|  |                                           |                                                               |
|  | نعم                                       | هل تم تشخيصك من قبل بسرطان الثدي ؟                            |
|  | لا                                        |                                                               |
|  | نعم                                       | هل تم تشخيص أحد افراد عائلتك سابقا بسرطان الثدي او الرحم ؟    |
|  | لا                                        |                                                               |
|  |                                           |                                                               |

|  |                                                                                                                                  |                                                        |
|--|----------------------------------------------------------------------------------------------------------------------------------|--------------------------------------------------------|
|  | الرجاء تحديد<br>درجة القرابة<br>تستطيع الأجابه<br>على هذا السؤال<br>فقط في حالة<br>أجبت بنعم<br>للسؤال السابق<br>(درجة القرابة ) | اقارب من الدرجة الأولى ( الام والأب<br>والاشقاء )      |
|  |                                                                                                                                  | اقارب من الدرجة الثانية ( أقارب من جهة<br>الام والأب ) |
|  |                                                                                                                                  | اقارب من الدرجة الثالثة ( أبناء أقارب الام<br>والأب )  |
|  |                                                                                                                                  | أقارب الدرجة الرابعة ( اجداد الوالدين )                |

| علاج هرموني | جراحي<br>وكيميائي | إشعاعي | كيميائي | جراحي | إذا تم<br>تشخيصك<br>بسرطان<br>الثدي ماهو<br>نوع العلاج<br>المستخدم؟ |
|-------------|-------------------|--------|---------|-------|---------------------------------------------------------------------|
|             |                   |        |         |       | إذا<br>استخدمت<br>العلاج<br>الكيميائي<br>الرجاء ذكر<br>اسم الدواء   |
|             |                   |        |         |       | إذا<br>استخدمت<br>العلاج<br>الهرموني<br>الرجاء ذكر<br>اسم الدواء    |
