# Supplementary material for: Metformin Therapy and Breast Cancer Incidence in the Hail Region
Source: Preprints.org preprint supplement (doi:10.20944/preprints202212.0244.v2), 2023-01-13
Supplement: Supplementary file 3 [file نسخة Informed-consent1631 x (1).pdf › suplmentery file/نسخة Informed-consent1631 x (1).pdf]

## Informed Consent Form

## نموذج الموافقة المسننية

You are invited by (Taif Khaled Alenezi, Shuruq Fahad Alanazi, Ahad Abdullah Alenzi) to participate in a scientific research

انتم مدعو/مدعوة من قبل (طيف خالد العنزي، شروق فهد العنزي، عاهد عبدالله العنزي) الى المشاركة في بحث علمي.

### Part 1: Research Participant Information Sheet:

### الجزء الأول: معلومات للمشارك في البحث:

#### Title of Research

#### عنوان البحث:

Metformin therapy and breast cancer incidence in hail region

استخدام علاج الميتفورم في نسبة حدوث سرطان الثدي بمنطقة حائل

#### Purpose of the Research

#### الغرض من البحث:

- To study the relation between using metformin among diabetic patients and the risk of developing breast cancer.
- In this study we will evaluate the anticancer activity of metformin in the prevention of breast cancer among diabetic patients.

- هذه الدراسة تهدف لتقييم استخدام الميتفورم في نيمر نض السكري وخطر الإصابة بمرض السرطان الثدي.
- نهدف هذه الدراسة سوف نقوم بتقييم فعالية الميتفورم في كمادة مضادة للسرطان.

#### Potential Benefits:

#### الفوائد المحتملة:

- This study will evaluate the efficacy of metformin for prevention of breast cancer.
- This study will assess the anticancer activity of metformin, which will give a new hope for cancer prevention.

- نهدف هذه الدراسة سوف نقوم بتقييم فعالية الميتفورم في كمادة مضادة للسرطان، وربما يتم تطبيق الضوء على فعالية الميتفورم كمادة مضادة للسرطان.

#### Potential Risks and Discomforts:

#### المخاطر المحتملة:

- N/A
- There won't be any potential for risk or discomfort since the study is an observational one

- الوجود
- لن يكون هناك مخاطر لأن الدراسة المستخدمة (وصفية)

#### Alternative to Participation (where applicable):

#### البديل عن المشاركة (إن وجدت):

N/A

الوجود

#### Cost/s Reimbursements (where applicable):

#### التكاليف / التعويضات المالية (إن وجدت):

There will be no cost for subject by participating in this research and no reimbursement for time and expenses.

نكون هناك تكلفة للشخص المشارك في هذا البحث خلال المشاركة في البحث وال تعويض عن الوقت والإنفاق

#### Termination of Participation (where applicable):

#### إنهاء المشاركة إذا أمكن:

- Include the following: "You may discontinue participation in the study at any time without

بضم نيم ي لن "يمكنك التوقف عن المشاركة في أي وقت دون عقوبة أو فقدان المزايا التي تحصل عليها من الدراسة

## Informed Consent Form

## نموذج الموافقة المسننية يحق لك الحصول عليها

## Informed Consent Form

penalty or loss of benefits to which you are otherwise entitled."

- When applicable, describe potential consequences of a subject's decision to withdraw and procedures for early termination.
- Explain circumstances under which participation may be terminated by the investigator without the subject's consent.
- NA

## نموذج الموافقة المسننة

- صرف النتائج المرحلة لقرار الشخص بالنسحاب، إذا أمكن وأجروا إلى إنهاء المبرر. -  
وضح الظروف التي يمكن بموجبها إنهاء المشاركة من قبل الباحث دون موافقة الشخص المعلن

### Compensation/Treatment (where applicable):

In case of experimental and interventional research study and in the event of medical harm or injury resulting from participation in the research study (N/A)

### المنعوضات/المراتبات (إن وجدت)

نفي حال كانت الدراسة البحثية تدخلية وعلاجية وإذا حدث ضرر - ال قدره - من جراء المشاركة فهذه الدراسة (الوجود)

### Voluntary Participation

Participation in this research is voluntary. Refusal to participate shall not entail penalty or loss of benefits to which you are otherwise entitled be entitled. You may withdraw from the research at any phase without loss of benefits to which he is otherwise entitled

You will be notified of all information that may emerge during the research period, the knowledge of which might be reasonably expected to affect your willingness to continue to participate in the research study

### المشاركة الطوعية:

شارك في البحث أمر طوعي. وحيثما قررت عدم المشاركة فلن يتبع عليك أية عقوبة أو خسارة لمنفعة نستحقها سيباخر، كما ان لك الحق بالنسحاب من البحث في أي مرحلة من مراحله دون ان تتعرض لخسارة أو فوائد منقصة نستحقها التي سبب

سيتم ابلاغك بجميع المعلومات التي ستؤثر سلباً على رغبتك في المشاركة في البحث في أي مرحلة من مراحله دون ان تتعرض لخسارة أو فوائد منقصة نستحقها التي سبب

### Confidentiality

Your identity and personal information, as a participant in this research study, will remain confidential with respect to any publications of the results of this study.

Your personal information and records in connection with this study will be kept confidential to the extent permitted by the law.

### السرية

لنشارك في هذا البحث، سنكون هويتك ومعلوماتك لشخصية سرية. فجميع المنشورات المتعلقة بنتائج الدراسة. كما سنقوم بمعلوماتك الشخصية والوثائق بك في هذا البحث سرية. فالحذود التي تسلم بها القانون.

### Description of the Research

This research is (cross-sectional observational study)

The approximate number of participants to be enrolled in this research is depending on the patients who want to participate (convenient size)

### وصف البحث

هذا البحث هو (بحث وصفي)

لنعد التقريبي لتأثير شخص الامتوقع مشاركتهم في هذا البحث هو على حسب الرغبة. (تتبع المشاركة) (عينة مناسبة)

## Informed Consent Form

You are expected to participate in this research for (In this observational study there won't be any follow up since the data will be collected directly from the patient at a specific point in time)

To participate in this research, you are required to (patients who want to participate should have been diagnosed with diabetes mellitus type 2)

Procedures or tests are being performed solely for this research is/are (N/A)

Drug, device or therapeutic procedure being performed solely for this research is (N/A) which is (N/A)

Body fluids and tissues may be sampled for research analyses and related purposes is/are (N/A)

## نموذج الموافقة المستنيرة

منك المشاركة في هذا البحث لمدة (خلال هذه الدراسة) لن يوجد متابعة للمعلومات يتم جمعها مباشرةً من المريض في نقطة زمنية محددة (من خلال المريض في وقت محدد)

في هذا البحث فإننا نطلب منك (الوجود هناك) مع عينة عدا إصابة الشخص المرشح للمشاركة في هذا البحث بالسكري النوع الثاني (إجراء الجراحات أو الفحوصات التي سيتم إجراؤها لأغراض هذا البحث فقط هي (الوجود) في العيادة أو الأجهزة أو الإجراءات العلاجية التي سيتم إجراؤها لأغراض هذا البحث فقط (هناك) والذي هو (الوجود).

العينات من سوائل وأنسجة الجسم التي سيتمكن من أخذها من خلال غرض هذا البحث فقط (هناك) (الوجود)

### Contact persons:

### الشخص الذي يمكن الاتصال به

For specific questions on this research you may call (Taif Khaled Alenezi, Shuruq Fahad Alanazi, Ahad Abdullah Alenzi), Mobile number (0569231228, 0503951795, 0506104649), email:

([119teef@gmail.com](mailto:119teef@gmail.com), [Shuruqez998@gmail.com](mailto:Shuruqez998@gmail.com), [ahadalanzi42@gmail.com](mailto:ahadalanzi42@gmail.com)) or you may call the

Research Ethics Committee (REC) office in the University of Hail (UoH) phone 016-5358200 or E-mail: [research.ethics@uoh.edu.sa](mailto:research.ethics@uoh.edu.sa), for general questions concerning research at UoH or research participants' rights.

إذا كان لديك أسئلة خاصة بالبحث حول هذا البحث فيمكنك الاتصال (طيف خالد العنزي، شروق فهد آلانزي، أحمد عبد الله العنزي) (رقم الجوال، 0569231228، 0503951795، 0506104649)

عبد الله العنزي (رقم الجوال، 0569231228، 0503951795، 0506104649)

0503951795, 0506104649)

والبريد الإلكتروني: ([119teef@gmail.com](mailto:119teef@gmail.com), ([Shuruqez998@gmail.com](mailto:Shuruqez998@gmail.com), ([ahadalanzi42@gmail.com](mailto:ahadalanzi42@gmail.com))

[Shuruqez998@gmail.com](mailto:Shuruqez998@gmail.com),

[ahadalanzi42@gmail.com](mailto:ahadalanzi42@gmail.com))

أو يمكنك الاتصال بمكتب لجنة أخلاقيات البحث (REC) في جامعة حائل (UoH) على هاتف رقم 016-586200 أو البريد الإلكتروني [research.ethics@uoh.edu.sa](mailto:research.ethics@uoh.edu.sa)

إذا كان لديك أي أسئلة تتعلق بالبحث بشكل عام في جامعة حائل أو حقوق المشاركين في البحث.

## Informed Consent Form

## نموذج الموافقة المسننية

### Part II: Authorization of Voluntary Participation in the Research

### الجزء الثاني: تفويض المشاركة التطوعية بالبحث

I acknowledge that I have read, or had explained to me in a language I understand, the attached Research Participant Information Sheet and that principal investigator has explained to me the nature and purpose of this studies, including the extent, if any, to which they are experimental, the possible complications as a result thereof and the consequences and risks reasonably to be expected, if any. I have had the opportunity to ask any questions I had with respect to this study and all questions I asked were answered to my satisfaction.

I understand that this research is not intended to be of any direct benefit to me and I voluntarily accept the risks and discomforts associated with it.

I acknowledge I do not have any pre-existing medical or emotional problem which would make it unwise for me to participate in this research.

I grant this consent as a voluntary contribution in the interest of research.

I confirm that I have read, or had read to me, the foregoing authorization and that all blanks or statements requiring completion were properly completed before I signed.

وبأنني تفكرت أو ليح ليبلغه مفهومة لدي - معلومات  
ن فالبحث وان الباحث الرئيسي سقد أوضح لي المشاركة  
طبيعة واهداف هذه الدراسة ومدى كونها تجريبية (ان  
كانت كذلك) كما قد ليحت المضاعفات المحتملة حدوثها  
ن جره هذا البحث والمخاطر او النزاعات المتوقعة ان  
وجدت كما اقر بانها قد انيحت لي الفرصة لنوحيه جميع  
السئلة المتعلقة بموضوع الدراسة وتلقيت الاجابات  
الاشارة

أفهم بان هذا البحث ليس له أي فائدة مباشرة لي ومع  
ذلك انطوع بالمشاركة مع علمي بالمخاطر والنزاعات  
المنجاة عنه.  
بأنني تلي اعان من أي مشاكل طبية او نفسية معروفة قو  
لدي بحيث يكون من غت الحكمة قبول مشاركتي بهذا  
البحث.  
أوليقي على ان يكون هذا الإقرار كمشاركة طوعية ن فهذا  
البحث.

وكذا بأنني تفكرت أو قرأ لهذا التفويض وان كل  
الالزمة قد تمت تعبئتها بدقة قبل نوفي علمي  
المعلومات  
عليه.

Research Participant/Surrogate Signature:

نوقيع المشارك ن فالبحث او لالم:

التاريخ:

Date: 24/2/2021

Place: Hail, Saudi Arabia

المكان : Specialized Diabetes Center in Hail at King Salman

Name: Foziah Naser Almublea

الاسم : فوزية ناصر

Relationship (If signed by surrogate):

صلة القرابة (إذا وقع من قبل و لالم):

## Informed Consent Form

## نموذج الموافقة المستنيرة

I confirm that I have accurately translated and/or read the information to the subject:

أقر بأنني قد قُرئت / أو ترجمت للمشارك مشاركة بدقّة هذه المعلومات

Witness Signature:

نوفيق الشاهد:

Date: 24/2/2021

التاريخ:



المكان:

Place: Hail, Saudi Arabia

Name: Taif khaled

الاسم:

I have fully explained to the above volunteer/ relative/ surrogate the nature and purpose of the above-mentioned research program (including the fact that the research will not result in any direct benefit and the extent, if any, to which the study is experimental), the possible complications as a result thereof and the consequences and risks, if any, if the volunteer decides to discontinue participation. It is my understanding that he/she understands the nature, purposes, and risks of these studies before he signs this informed consent. I have also offered to answer any questions relating to these studies and have fully and completely answered all such questions.

قدّيان قدّدت للمطوع/ لقرّبه / أو و لمطوره المذکور أعلاه بصورة كاملة طعيّة وأهداف م يوقع البحث المذکور والمتمضمن عدم وجود فائدة مبا مية على المشارك وال أي مدى ) ان وجد ( هدراسة تجريبية. كما قدّدت المضاعفات المحتملة حدوثها من جرّاء هذا البحث والمخاطر، إلّ النزعات المتوقعة الم تبعة ) ان وجدت ( إذا قرر الم تطوع انهاء مشاركتهم بالدراسة. كما انه من المفهوم لديّ بانهم قدّ فهم طعيّة الدراسة والغرض منها والمخاطر الناتجة عنها وذلك قبل نوفيّعهم على الموافقة المشارقة، ولقدّ قدمت بنوضيح استعدادي للإجابة على أي أسئلة متصلة بهذه الدراسة، وقمت فعّال بالجابة الشائلة على جميعها أسئلة المعلقة بالبحث.

Signature of Principal Investigator:



نوفيق الباحث الرئيسي

Name: Name: Mhdia Elhadi Dafa

الاسم:

Date:

التاريخ:
